# Supplementary material
Source: ML conference proceedings conference paper supplement (https://openreview.net/forum?id=JzdYX8uzT4W)
Supplement: supplementary_material [file attachment]

270 **A Appendix**

271 Optionally include extra information (complete proofs, additional experiments and plots) in the  
 272 appendix. This section will often be part of the supplemental material.

273 **A.1 Proof of proposition 1**

274 **Proposition 1.** There exists a negative-positive coupling (NPC) multiplier  $q_{B,i}^{(1)}$  in the gradient of  
 275  $L_i^{(1)}$ :

$$\begin{cases} -\nabla_{\mathbf{z}_i^{(1)}} L_i^{(1)} = \frac{q_{B,i}^{(1)}}{\tau} \left[ \mathbf{z}_i^{(2)} - \sum_{l \in \{1,2\}, j \in [1,N], j \neq i} \frac{\exp(\langle \mathbf{z}_i^{(1)}, \mathbf{z}_j^{(l)} \rangle / \tau)}{\sum_{q \in \{1,2\}, j \in [1,N], j \neq i} \exp(\langle \mathbf{z}_i^{(1)}, \mathbf{z}_j^{(q)} \rangle / \tau)} \cdot \mathbf{z}_j^{(l)} \right] \\ -\nabla_{\mathbf{z}_i^{(2)}} L_i^{(1)} = \frac{q_{B,i}^{(1)}}{\tau} \cdot \mathbf{z}_i^{(1)} \\ -\nabla_{\mathbf{z}_j^{(l)}} L_i^{(1)} = -\frac{q_{B,i}^{(1)}}{\tau} \frac{\exp(\langle \mathbf{z}_i^{(1)}, \mathbf{z}_j^{(l)} \rangle / \tau)}{\sum_{q \in \{1,2\}, j \in [1,N], j \neq i} \exp(\langle \mathbf{z}_i^{(1)}, \mathbf{z}_j^{(q)} \rangle / \tau)} \cdot \mathbf{z}_i^{(1)} \end{cases}$$

276 where the NPC multiplier  $q_{B,i}^{(1)}$  is:

$$q_{B,i}^{(1)} = 1 - \frac{\exp(\langle \mathbf{z}_i^{(1)}, \mathbf{z}_i^{(2)} \rangle / \tau)}{\sum_{q \in \{1,2\}, j \in [1,N], j \neq i} \exp(\langle \mathbf{z}_i^{(1)}, \mathbf{z}_j^{(q)} \rangle / \tau)}$$

277 Due to the symmetry, a similar NPC multiplier  $q_{B,i}^{(k)}$  exists in the gradient of  $L_i^{(k)}$ ,  $k \in \{1, 2\}$ ,  $i \in$   
 278  $[1, N]$ .

*Proof.*

$$\begin{aligned} -\nabla_{\mathbf{z}_i^{(1)}} L_i^{(1)} &= \frac{\mathbf{z}_i}{\tau} - \frac{1}{Y} \cdot \exp(\langle \mathbf{z}_i^{(1)}, \mathbf{z}_i^{(2)} \rangle / \tau) \cdot \frac{\mathbf{z}_i^{(2)}}{\tau} - \frac{1}{Y} \cdot \sum_{q \in \{1,2\}, j \in [1,N], j \neq i} \exp(\langle \mathbf{z}_i^{(1)}, \mathbf{z}_j^{(q)} \rangle / \tau) \frac{\mathbf{z}_j^{(q)}}{\tau} \\ &= \left(1 - \frac{1}{Y} \cdot \exp(\langle \mathbf{z}_i^{(1)}, \mathbf{z}_i^{(2)} \rangle / \tau)\right) \frac{\mathbf{z}_i^{(2)}}{\tau} - \frac{1}{Y} \cdot \sum_{q \in \{1,2\}, j \in [1,N], j \neq i} \exp(\langle \mathbf{z}_i^{(1)}, \mathbf{z}_j^{(q)} \rangle / \tau) \frac{\mathbf{z}_j^{(q)}}{\tau} \\ &= \frac{1}{\tau} \left(1 - \frac{1}{Y} \cdot \exp(\langle \mathbf{z}_i^{(1)}, \mathbf{z}_i^{(2)} \rangle / \tau)\right) \left[ \mathbf{z}_i^{(2)} - \sum_{q \in \{1,2\}, j \in [1,N], j \neq i} \frac{\exp(\langle \mathbf{z}_i^{(1)}, \mathbf{z}_j^{(q)} \rangle / \tau)}{U} \cdot \mathbf{z}_j^{(q)} \right] \\ &= \frac{q_{B,i}^{(1)}}{\tau} \left[ \mathbf{z}_i^{(2)} - \sum_{q \in \{1,2\}, j \in [1,N], j \neq i} \frac{\exp(\langle \mathbf{z}_i^{(1)}, \mathbf{z}_j^{(q)} \rangle / \tau)}{U} \cdot \mathbf{z}_j^{(q)} \right] \end{aligned}$$

279 where  $Y = \exp(\langle \mathbf{z}_i^{(1)}, \mathbf{z}_i^{(2)} \rangle / \tau) + \sum_{q \in \{1,2\}, j \in [1,N], j \neq i} \exp(\langle \mathbf{z}_i^{(1)}, \mathbf{z}_j^{(q)} \rangle / \tau)$ ,  $U =$   
 280  $\sum_{q \in \{1,2\}, j \in [1,N], j \neq i} \exp(\langle \mathbf{z}_i^{(1)}, \mathbf{z}_j^{(q)} \rangle / \tau)$ .

$$\begin{aligned} -\nabla_{\mathbf{z}_i^{(2)}} L_i^{(1)} &= \frac{1}{\tau} \mathbf{z}_i^{(1)} - \frac{1}{Y} \exp(\langle \mathbf{z}_i^{(1)}, \mathbf{z}_i^{(2)} \rangle / \tau) \cdot \frac{\mathbf{z}_i^{(1)}}{\tau} \\ &= \frac{q_{B,i}^{(1)}}{\tau} \cdot \mathbf{z}_i^{(1)} \end{aligned}$$

$$\begin{aligned} -\nabla_{\mathbf{z}_j^{(l)}} L_i^{(1)} &= \frac{1}{Y} \exp(\langle \mathbf{z}_i^{(1)}, \mathbf{z}_j^{(q)} \rangle / \tau) \cdot \frac{\mathbf{z}_i^{(1)}}{\tau} \\ &= \frac{q_{B,i}^{(1)}}{\tau} \cdot \frac{\exp(\langle \mathbf{z}_i^{(1)}, \mathbf{z}_j^{(q)} \rangle / \tau)}{U} \mathbf{z}_i^{(1)} \end{aligned}$$

281

□

282 **A.2 Proof of proposition 2**

283 **Proposition 2.** Removing the positive pair from the denominator of Equation 2 leads to a decoupled  
 284 contrastive learning loss. If we remove the NPC multiplier  $q_{B,i}^{(k)}$  from Equation 2, we reach a  
 285 decoupled contrastive learning loss  $L_{DC} = \sum_{k \in \{1,2\}, i \in [1,N]} L_{DC,i}^{(k)}$ , where  $L_{DC,i}^{(k)}$  is:

$$\begin{aligned} L_{DC,i}^{(k)} &= -\log \frac{\exp(\langle \mathbf{z}_i^{(1)}, \mathbf{z}_i^{(2)} \rangle / \tau)}{\exp(\langle \mathbf{z}_i^{(1)}, \mathbf{z}_i^{(2)} \rangle / \tau) + \sum_{l \in \{1,2\}, j \in [1,N], j \neq i} \exp(\langle \mathbf{z}_i^{(k)}, \mathbf{z}_j^{(l)} \rangle / \tau)} \\ &= -\langle \mathbf{z}_i^{(1)}, \mathbf{z}_i^{(2)} \rangle / \tau + \log \sum_{l \in \{1,2\}, j \in [1,N], j \neq i} \exp(\langle \mathbf{z}_i^{(k)}, \mathbf{z}_j^{(l)} \rangle / \tau) \end{aligned}$$

286 *Proof.* By removing the positive term the denominator of Equation 4, we can repeat the procedure in  
 287 the proof of Proposition 1 and see that the coupling term disappears.

288 □

289 **A.3 Linear classification on ImageNet-1K**

290 Top-1 accuracies of linear evaluation in Table 5 shows that, we compare with the state-of-the-art  
 291 SSL approaches on ImageNet-1K. For fairness, we list the batch size and learning epoch of each  
 292 individual approach, which are shown in the original paper. During pre-training, our DCL is based on  
 293 a ResNet-50 backbone, with two views with size  $224 \times 224$ . Without relatively huge batch sizes or  
 294 other pre-training schemes, i.e., momentum encoder, clustering, and prediction head, our DCL relies  
 295 on its simplicity to reach competitive performance. We report both 200-epoch and 400-epoch versions  
 296 of our DCL. It achieves 69.5% under the batch size of 256 and 400-epoch pre-training, which is  
 297 better than SimCLR [8] in their optimal case, i.e., batch size of 4096, and 1000-epoch. Note that  
 298 SwAV [26], BYOL [15], SimCLR [8], and PIRL [27] need huge batch size of 4096, and SwAV [17]  
 299 further applies multi-cropping as generating extra views to reach optimal performance.

Table 5: ImageNet-1K top-1 accuracies (%) of linear classifiers trained on representations of different SSL methods.

| Method             | Architecture              | Param. (M) | Batch size | Epochs | Top-1 (%) |
|--------------------|---------------------------|------------|------------|--------|-----------|
| Relative-Loc. [28] | ResNet-50                 | 24         | 256        | 200    | 49.3      |
| Rotation-Pred. [3] | ResNet-50                 | 24         | 256        | 200    | 55.0      |
| DeepCluster [26]   | ResNet-50                 | 24         | 256        | 200    | 57.7      |
| NPID [4]           | ResNet-50                 | 24         | 256        | 200    | 56.5      |
| Local Agg. [29]    | ResNet-50                 | 24         | 256        | 200    | 58.8      |
| MoCo [7]           | ResNet-50                 | 24         | 256        | 200    | 60.6      |
| SimCLR [8]         | ResNet-50                 | 28         | 256        | 200    | 61.8      |
| CMC [6]            | ResNet-50 <sub>L+ab</sub> | 47         | 256        | 280    | 64.1      |
| MoCo v2 [25]       | ResNet-50                 | 28         | 256        | 200    | 67.5      |
| SwAV [17]          | ResNet-50                 | 28         | 4096       | 200    | 69.1      |
| SimSiam [16]       | ResNet-50                 | 28         | 256        | 200    | 70.0      |
| InfoMin [30]       | ResNet-50                 | 28         | 256        | 200    | 70.1      |
| BYOL [15]          | ResNet-50                 | 28         | 4096       | 200    | 70.6      |
| DCL                | ResNet-50                 | 28         | 256        | 200    | 67.8      |
| PIRL [27]          | ResNet-50                 | 24         | 256        | 800    | 63.6      |
| SimCLR [8]         | ResNet-50                 | 28         | 4096       | 1000   | 69.3      |
| MoCo v2 [25]       | ResNet-50                 | 28         | 256        | 800    | 71.1      |
| SwAV [17]          | ResNet-50                 | 28         | 4096       | 400    | 70.7      |
| SimSiam [16]       | ResNet-50                 | 28         | 256        | 800    | 71.3      |
| DCL                | ResNet-50                 | 28         | 256        | 400    | 69.5      |

## 300 A.4 Implementation details

301 **DCL augmentations.** We follow the settings of SimCLR [8] to set up the data augmentations. We  
302 use *RandomResizedCrop* with scale in [0.08, 1.0] and follow by *RandomHorizontalFlip*. Then,  
303 *ColorJittering* with strength in [0.8, 0.8, 0.8, 0.2] with probability of 0.8, and *RandomGrayscale*  
304 with probability of 0.2. *GaussianBlur* includes Gaussian kernel with standard deviation in [0.1,  
305 2.0].

306 **Linear evaluation.** Following the open-sourced project, OpenSelfSup [23], we first train the linear  
307 classifier with batch size 256 for 100 epochs. We use the SGD optimizer with momentum = 0.9,  
308 and weight decay = 0. The base *lr* is set to 30.0 and decay by 0.1 at epoch [60, 80]. We further  
309 demonstrate the linear evaluation protocol of SimSiam [16], which raises the batch size to 4096  
310 for 90 epochs. The optimizer is switched to LARS optimizer with base *lr* = 1.2 and cosine decay  
311 schedule. The momentum and weight decay are remained unchanged. We found the second one  
312 slightly improves the performance.

## 313 References

- 314 [1] Mehdi Noroozi and Paolo Favaro. Unsupervised learning of visual representations by solving  
315 jigsaw puzzles. In *European Conference on Computer Vision*, pages 69–84. Springer, 2016.
- 316 [2] Richard Zhang, Phillip Isola, and Alexei A Efros. Colorful image colorization. In *European*  
317 *conference on computer vision*, pages 649–666. Springer, 2016.
- 318 [3] Spyros Gidaris, Praveer Singh, and Nikos Komodakis. Unsupervised representation learning by  
319 predicting image rotations. *arXiv preprint arXiv:1803.07728*, 2018.
- 320 [4] Zhirong Wu, Yuanjun Xiong, Stella X Yu, and Dahua Lin. Unsupervised feature learning via  
321 non-parametric instance discrimination. In *Proceedings of the IEEE Conference on Computer*  
322 *Vision and Pattern Recognition*, pages 3733–3742, 2018.
- 323 [5] Aaron van den Oord, Yazhe Li, and Oriol Vinyals. Representation learning with contrastive  
324 predictive coding. *arXiv preprint arXiv:1807.03748*, 2018.
- 325 [6] Yonglong Tian, Dilip Krishnan, and Phillip Isola. Contrastive multiview coding. *arXiv preprint*  
326 *arXiv:1906.05849*, 2019.
- 327 [7] Kaiming He, Haoqi Fan, Yuxin Wu, Saining Xie, and Ross Girshick. Momentum contrast for  
328 unsupervised visual representation learning. In *Proceedings of the IEEE/CVF Conference on*  
329 *Computer Vision and Pattern Recognition*, pages 9729–9738, 2020.
- 330 [8] Ting Chen, Simon Kornblith, Mohammad Norouzi, and Geoffrey Hinton. A simple framework  
331 for contrastive learning of visual representations. *arXiv preprint arXiv:2002.05709*, 2020.
- 332 [9] Ian Goodfellow, Jean Pouget-Abadie, Mehdi Mirza, Bing Xu, David Warde-Farley, Sherjil  
333 Ozair, Aaron Courville, and Yoshua Bengio. Generative adversarial nets. In *Advances in neural*  
334 *information processing systems*, pages 2672–2680, 2014.
- 335 [10] Alec Radford, Luke Metz, and Soumith Chintala. Unsupervised representation learning with  
336 deep convolutional generative adversarial networks. *arXiv preprint arXiv:1511.06434*, 2015.
- 337 [11] Raia Hadsell, Sumit Chopra, and Yann LeCun. Dimensionality reduction by learning an  
338 invariant mapping. In *2006 IEEE Computer Society Conference on Computer Vision and*  
339 *Pattern Recognition (CVPR 2006), 17-22 June 2006, New York, NY, USA*, pages 1735–1742.  
340 IEEE Computer Society, 2006.
- 341 [12] Mang Ye, Xu Zhang, Pong C Yuen, and Shih-Fu Chang. Unsupervised embedding learning via  
342 invariant and spreading instance feature. In *Proceedings of the IEEE Conference on computer*  
343 *vision and pattern recognition*, pages 6210–6219, 2019.
- 344 [13] Prannay Khosla, Piotr Teterwak, Chen Wang, Aaron Sarna, Yonglong Tian, Phillip Isola, Aaron  
345 Maschinot, Ce Liu, and Dilip Krishnan. Supervised contrastive learning. *CoRR*, abs/2004.11362,  
346 2020.
- 347 [14] Yang You, Igor Gitman, and Boris Ginsburg. Large batch training of convolutional networks.  
348 *arXiv preprint arXiv:1708.03888*, 2017.

- 349 [15] Jean-Bastien Grill, Florian Strub, Florent Alché, Corentin Tallec, Pierre H. Richemond, Elena  
350 Buchatskaya, Carl Doersch, Bernardo Ávila Pires, Zhaohan Guo, Mohammad Gheshlaghi Azar,  
351 Bilal Piot, Koray Kavukcuoglu, Rémi Munos, and Michal Valko. Bootstrap your own latent - A  
352 new approach to self-supervised learning. In Hugo Larochelle, Marc’Aurelio Ranzato, Raia  
353 Hadsell, Maria-Florina Balcan, and Hsuan-Tien Lin, editors, *Advances in Neural Information  
354 Processing Systems 33: Annual Conference on Neural Information Processing Systems 2020,  
355 NeurIPS 2020, December 6-12, 2020, virtual*, 2020.
- 356 [16] Xinlei Chen and Kaiming He. Exploring simple siamese representation learning. *CoRR*,  
357 abs/2011.10566, 2020.
- 358 [17] Mathilde Caron, Ishan Misra, Julien Mairal, Priya Goyal, Piotr Bojanowski, and Armand Joulin.  
359 Unsupervised learning of visual features by contrasting cluster assignments. *arXiv preprint  
360 arXiv:2006.09882*, 2020.
- 361 [18] Alexey Dosovitskiy, Philipp Fischer, Jost Tobias Springenberg, Martin Riedmiller, and Thomas  
362 Brox. Discriminative unsupervised feature learning with exemplar convolutional neural net-  
363 works. *IEEE transactions on pattern analysis and machine intelligence*, 38(9):1734–1747,  
364 2015.
- 365 [19] Jia Deng, Wei Dong, Richard Socher, Li-Jia Li, Kai Li, and Li Fei-Fei. Imagenet: A large-  
366 scale hierarchical image database. In *2009 IEEE conference on computer vision and pattern  
367 recognition*, pages 248–255. Ieee, 2009.
- 368 [20] Alex Krizhevsky, Geoffrey Hinton, et al. Learning multiple layers of features from tiny images.  
369 2009.
- 370 [21] Adam Coates, Andrew Ng, and Honglak Lee. An analysis of single-layer networks in unsuper-  
371 vised feature learning. In *Proceedings of the fourteenth international conference on artificial  
372 intelligence and statistics*, pages 215–223. JMLR Workshop and Conference Proceedings, 2011.
- 373 [22] Kaiming He, Xiangyu Zhang, Shaoqing Ren, and Jian Sun. Deep residual learning for image  
374 recognition. In *Proceedings of the IEEE conference on computer vision and pattern recognition*,  
375 pages 770–778, 2016.
- 376 [23] Xiaoahang Zhan, Jiahao Xie, Ziwei Liu, Dahua Lin, and Chen Change Loy. OpenSelfSup: Open  
377 mmlab self-supervised learning toolbox and benchmark. 2020.
- 378 [24] Xudong Wang, Ziwei Liu, and X Yu Stella. Unsupervised feature learning by cross-level  
379 instance-group discrimination.
- 380 [25] Xinlei Chen, Haoqi Fan, Ross Girshick, and Kaiming He. Improved baselines with momentum  
381 contrastive learning. *arXiv preprint arXiv:2003.04297*, 2020.
- 382 [26] Mathilde Caron, Piotr Bojanowski, Armand Joulin, and Matthijs Douze. Deep clustering  
383 for unsupervised learning of visual features. In *Proceedings of the European Conference on  
384 Computer Vision (ECCV)*, pages 132–149, 2018.
- 385 [27] Ishan Misra and Laurens van der Maaten. Self-supervised learning of pretext-invariant rep-  
386 resentations. In *Proceedings of the IEEE/CVF Conference on Computer Vision and Pattern  
387 Recognition*, pages 6707–6717, 2020.
- 388 [28] Carl Doersch, Abhinav Gupta, and Alexei A Efros. Unsupervised visual representation learning  
389 by context prediction. In *Proceedings of the IEEE international conference on computer vision*,  
390 pages 1422–1430, 2015.
- 391 [29] Chengxu Zhuang, Alex Lin Zhai, and Daniel Yamins. Local aggregation for unsupervised  
392 learning of visual embeddings. In *Proceedings of the IEEE/CVF International Conference on  
393 Computer Vision*, pages 6002–6012, 2019.
- 394 [30] Yonglong Tian, Chen Sun, Ben Poole, Dilip Krishnan, Cordelia Schmid, and Phillip Isola. What  
395 makes for good views for contrastive learning. *arXiv preprint arXiv:2005.10243*, 2020.
